# Supplementary material for: Role of the D1-D2 Linker of Human VCP/p97 in the Asymmetry and ATPase Activity of the D1-domain
Source: PubMed Central journal article supplement (PMC4730245; doi:10.1038/srep20037), 2016-01-28
Supplement: srep20037-s1.pdf [file srep20037-s1.pdf]

## **Supplementary Information for**

### **Role of the D1-D2 Linker of Human VCP/p97 in the Asymmetry and ATPase Activity of the D1-domain**

Wai Kwan Tang and Di Xia<sup>¶</sup>.

Laboratory of Cell Biology, Center for Cancer Research, National Cancer  
Institute, National Institutes of Health, Bethesda, MD 20892, USA.

<sup>¶</sup>Correspondence should be addressed to DX: e-mail: [xiad@mail.nih.gov](mailto:xiad@mail.nih.gov)

Laboratory of Cell Biology, NCI, NIH  
37 Convent Drive, Building 37, Room 2122C  
Bethesda, MD 20892  
Tel: (301)-435-6315  
Fax: (301)-480-2315

## Supplemental Information

**Figure S1. Schematic drawing of vectors defined for the calculation of asymmetric index.** Symmetric objects such as the six subunits of p97 are represented by shaded triangles. Atom  $i$  ( $i = 1, 2, \dots, N$ ), from  $j^{\text{th}}$  subunit ( $j = 1, \dots, 6$ ) is represented by a dot labeled with  $x_{i,j}$  in black color. Vectors drawn between pairs of neighboring atoms are shown as blue arrows labeled with  $a_{i,j}$ . Cross vectors constructed from neighboring vectors are shown as red arrows labeled with  $b_{i,j}$ . The asymmetric index (Asym Index) is defined as the averaged angle in degree ( $^{\circ}$ ) among pairs of cross vectors. For a perfect, proper hexamer, in which all cross vectors are parallel to each other, the Asym Index is zero.

**Figure S2. Side-chain conformations of the *in trans* Arg-finger residue R359 in structures of N-D1 p97 bound with either ADP or ATP $\gamma$ S** Structures of wild-type  $^{\text{ND1}}\text{p97}^{\text{Shrt}}$  bound with ADP (PDB:1E32) colored in magenta and R155H  $^{\text{ND1}}\text{p97}^{\text{Lng}}$  bound with ATP $\gamma$ S (PDB: 4KO8) in gray are superposed based on the D1-domain. Side-chains of Arg-finger residue R359 and the bound nucleotides are shown in stick representations.

**Figure S3. Mobility change revealed for side-chain of the *in trans* Arg-finger residue R359 in  $^{\text{ND1}}\text{p97}^{\text{Shrt}}$  and  $^{\text{ND1}}\text{p97}^{\text{Lng}}$**  Side-chains of the *in trans* Arg-finger residue R359 in stick model from four different ADP-bound structures are overlaid with electron density meshes contoured at  $1\sigma$  level from their respective  $2Fo-Fc$  maps. The

stick models in magenta, cyan, yellow, green and orange are from structures of (A) wild-type <sup>ND1</sup>p97<sup>Shrt</sup>, (B) L198W <sup>ND1</sup>p97<sup>Shrt</sup>, (C) wild-type <sup>ND1</sup>p97<sup>Lng</sup>, (D) R155H <sup>ND1</sup>p97<sup>Lng</sup> and (E) <sup>Full</sup>p97 (PDB:3CF2) respectively.

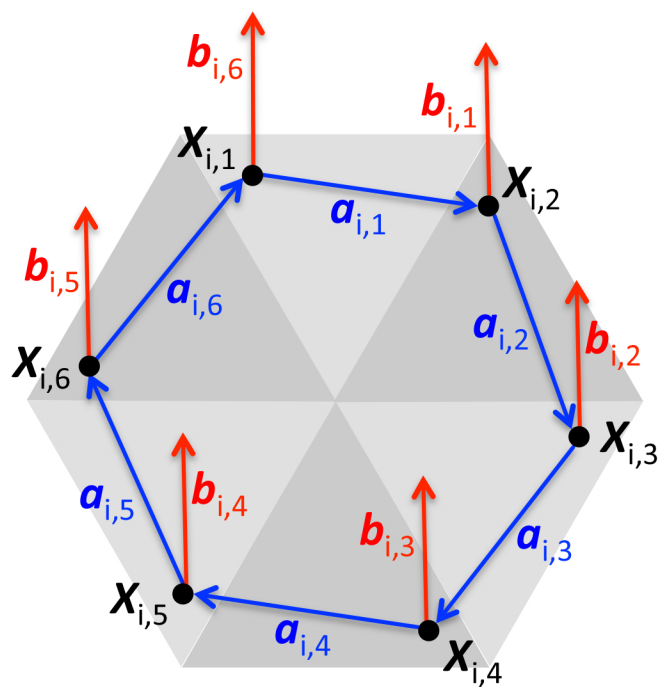

Tang & Xia, Figure.S1

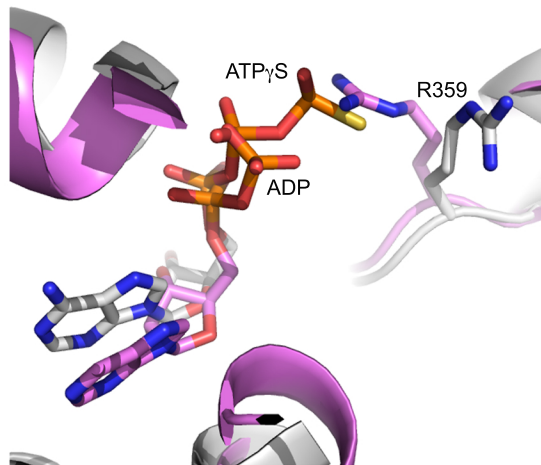

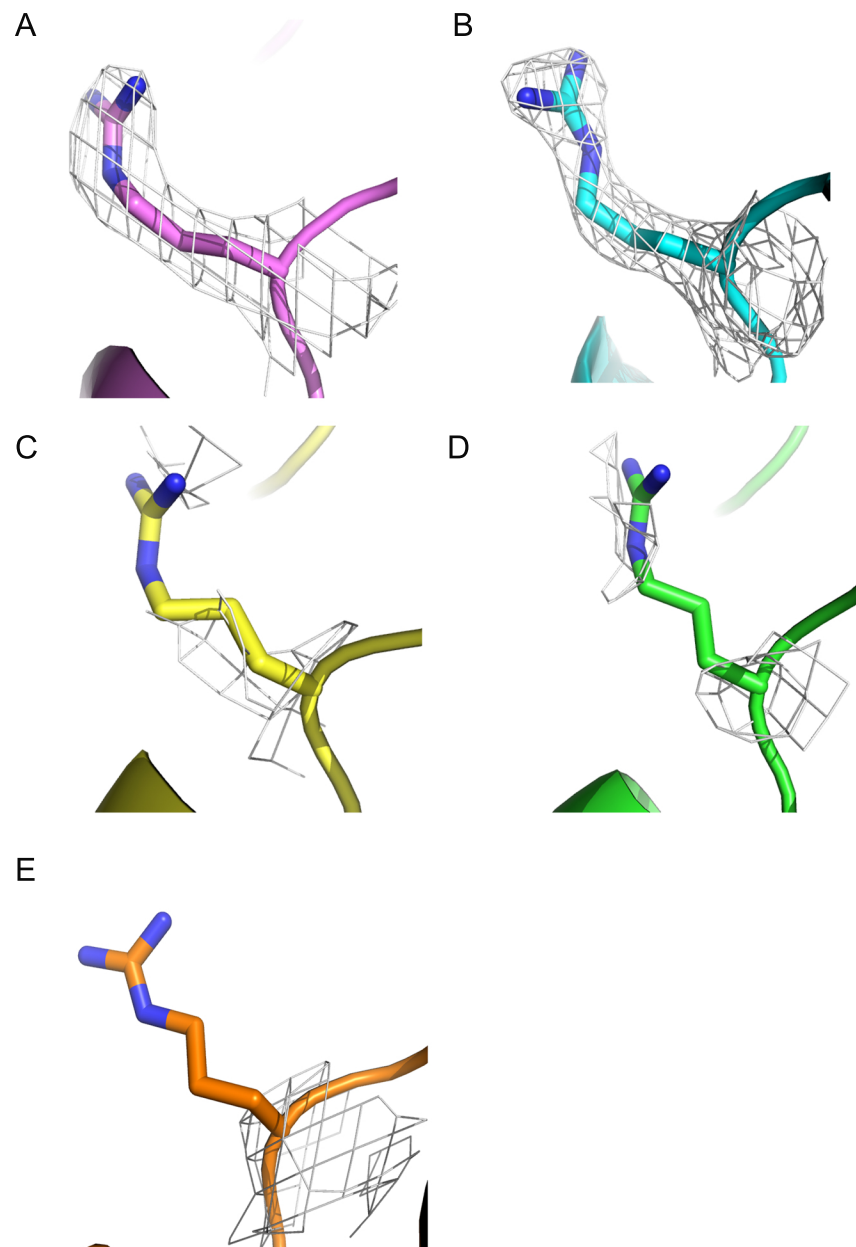

Tang & Xia, Figure S3
